# Supplementary material for: Corona discharge-induced reduction of quinones in negative electrospray ionization mass spectrometry
Source: Royal Society of Chemistry journal article supplement (doi:10.1039/c7ra08523k), 2017-01-01
Supplement: c7ra08523k1.pdf [file c7ra08523k1.pdf]

## Supporting Information

### Corona discharge-induced reduction of quinones in negative electrospray ionization mass spectrometry

Jiying Pei,<sup>a,b</sup> Cheng-Chih Hsu,<sup>c</sup> Yinghui Wang,<sup>a,b,\*</sup> Kefu Yu<sup>a,b,\*</sup>

<sup>a</sup> School of Marine Sciences, Guangxi University, Nanning, 530004, P. R. China

<sup>b</sup> Coral Reef Research Center of China, Nanning, 53004, P. R. China

<sup>c</sup> Department of Chemistry, National Taiwan University, Taipei 10617, Taiwan

\*Contact Information for Corresponding Author:

School of Marine Sciences, Guangxi University, Nanning, Guangxi, 530004, P. R.

China. Yinghui Wang: Tel: (+) 86 771 3227177. E-mail: wyh@gxu.edu.cn.

**Key word:** Quinone reduction, Corona discharge, Negative electrospray ionization

## Table of Contents

|                                                                                                                                                                        |    |
|------------------------------------------------------------------------------------------------------------------------------------------------------------------------|----|
| <b>Fig. S1</b> Setup used in the experiment .....                                                                                                                      | 3  |
| <b>Fig. S2</b> MS/MS spectra of a) $M^-$ ( $m/z$ 176) and b) $[M + H]^-$ ( $m/z$ 177) ions of DCBQ .....                                                               | 4  |
| <b>Fig. S3</b> Oxidation pathway of reserpine .....                                                                                                                    | 5  |
| <b>Fig. S4</b> Effect of $NH_4Ac$ on DCBQ reduction during negative ESI MS.....                                                                                        | 6  |
| <b>Fig. S5</b> Effect of sheath gas ( $SF_6$ ) on DCBQ reduction during negative ESI MS.....                                                                           | 7  |
| <b>Fig. S6.</b> Effect of a) $NH_4Ac$ , b) solvent composition and c) sheath gas ( $N_2$ ) on DCBQ reduction during negative ESI MS with a commercial ESI source. .... | 8  |
| <b>Fig. S7</b> MS/MS spectra of a) $M^-$ ( $m/z$ 158) and b) $[M + H]^-$ ( $m/z$ 159) ions of 1,2-NQ .....                                                             | 9  |
| <b>Fig. S8</b> Effect of sheath gas ( $N_2$ ) on 1,2-NQ reduction in a commercial ESI source with Orbitrap Exactive Plus mass spectrometer.....                        | 10 |
| <b>Fig. S9</b> a) High resolution and b, c) $MS^n$ mass spectra of DCBQ.....                                                                                           | 12 |

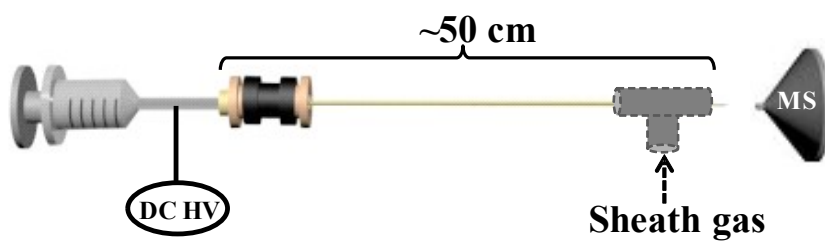

**Fig. S1** Setup used in the experiment

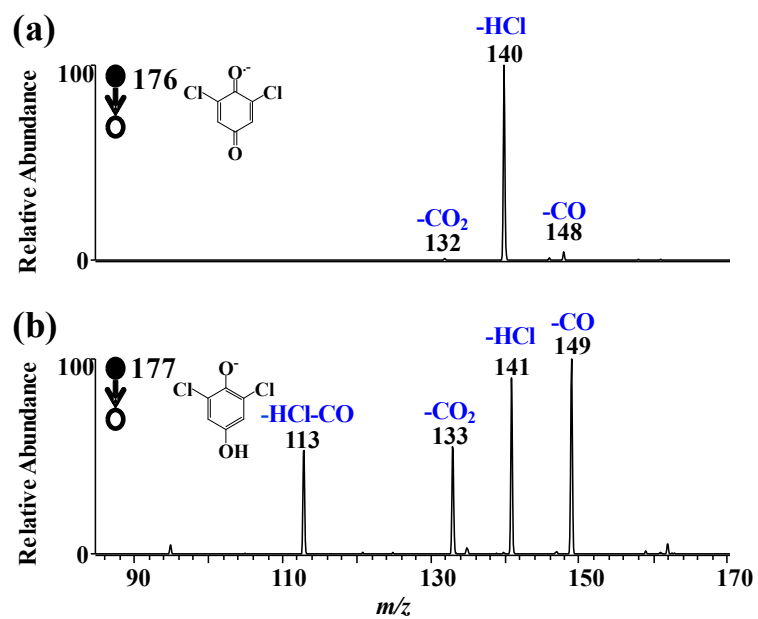

**Fig. S2** MS/MS spectra of a)  $M^-$  ( $m/z$  176) and b)  $[M + H]^-$  ( $m/z$  177) ions of DCBQ

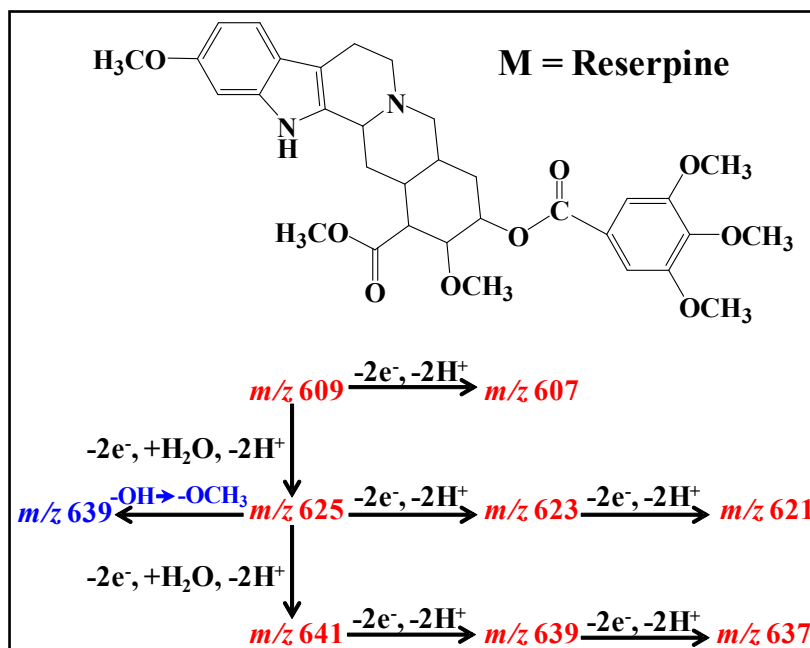

**Fig. S3** Oxidation pathway of reserpine

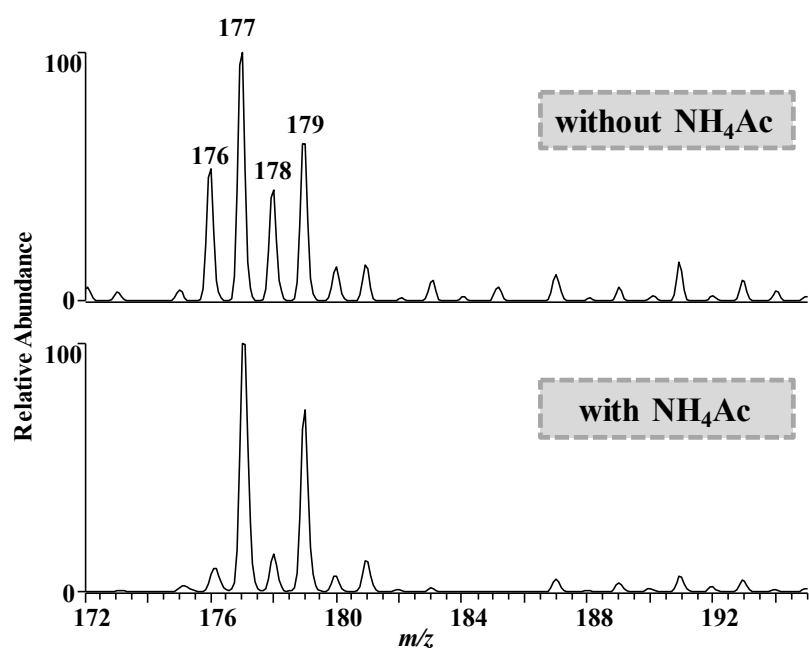

**Fig. S4** Effect of NH<sub>4</sub>Ac (5 mmol/L) on DCBQ (2  $\mu$ g/mL in CH<sub>3</sub>OH/H<sub>2</sub>O (v/v, 1:1)) reduction during negative ESI MS. Spray voltage = 3 kV, flow rate = 2  $\mu$ L/min.

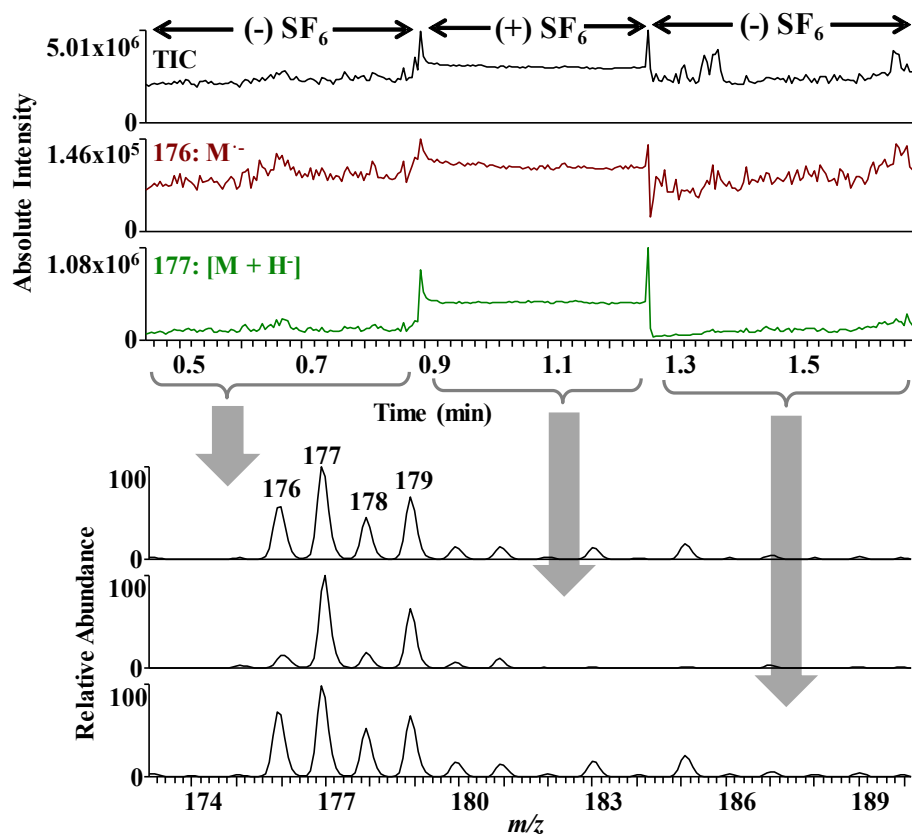

**Fig. S5** Effect of sheath gas ( $\text{SF}_6$ ) on DCBQ ( $2 \mu\text{g/mL}$  in  $\text{CH}_3\text{OH}/\text{H}_2\text{O}$  (v/v, 1:1)) reduction during negative ESI MS. Flow rate =  $2 \mu\text{L}/\text{min}$ , spray voltage = 3 kV.

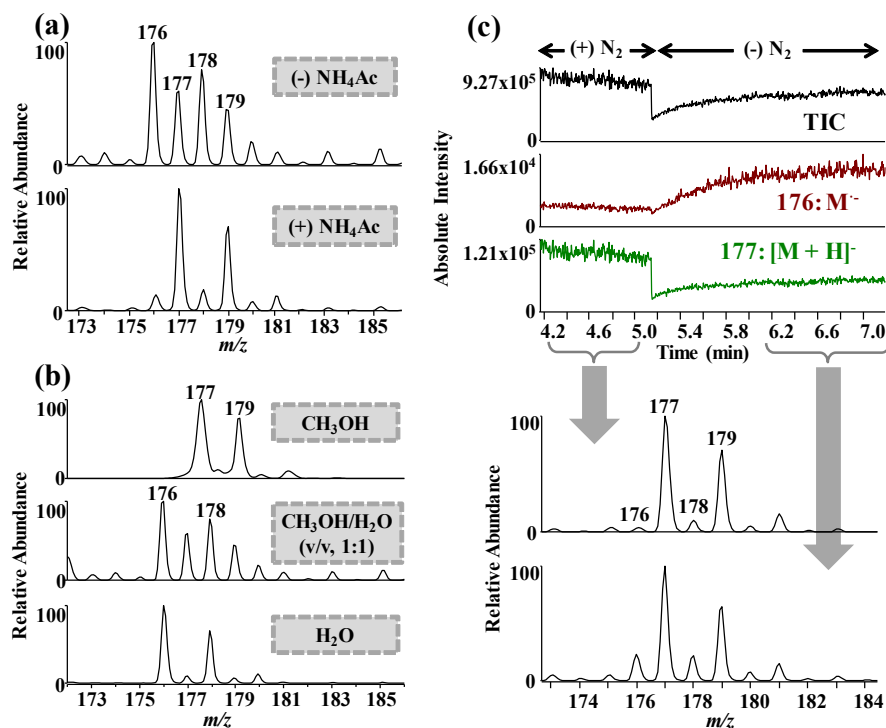

**Fig. S6** Effect of a)  $\text{NH}_4\text{Ac}$ , b) solvent composition and c) sheath gas ( $\text{N}_2$ ) on DCBQ ( $2\ \mu\text{g}/\text{mL}$ ) reduction during negative ESI MS with a commercial ESI source. Conditions: a) flow rate =  $2\ \mu\text{L}/\text{min}$ , spray voltage = 3 kV, solvent:  $\text{CH}_3\text{OH}/\text{H}_2\text{O}$  (v/v, 1:1),  $\text{N}_2$  flow rate = 5 arb; b) flow rate =  $2\ \mu\text{L}/\text{min}$ , spray voltage = 3 kV,  $\text{N}_2$  flow rate = 5 arb; c) flow rate =  $2\ \mu\text{L}/\text{min}$ , spray voltage = 5 kV, solvent:  $\text{CH}_3\text{OH}/\text{H}_2\text{O}$  (v/v, 1:1),  $C_{\text{NH}_4\text{Ac}} = 5\ \text{mmol}/\text{L}$ ,  $\text{N}_2$  flow rate = 5 arb.



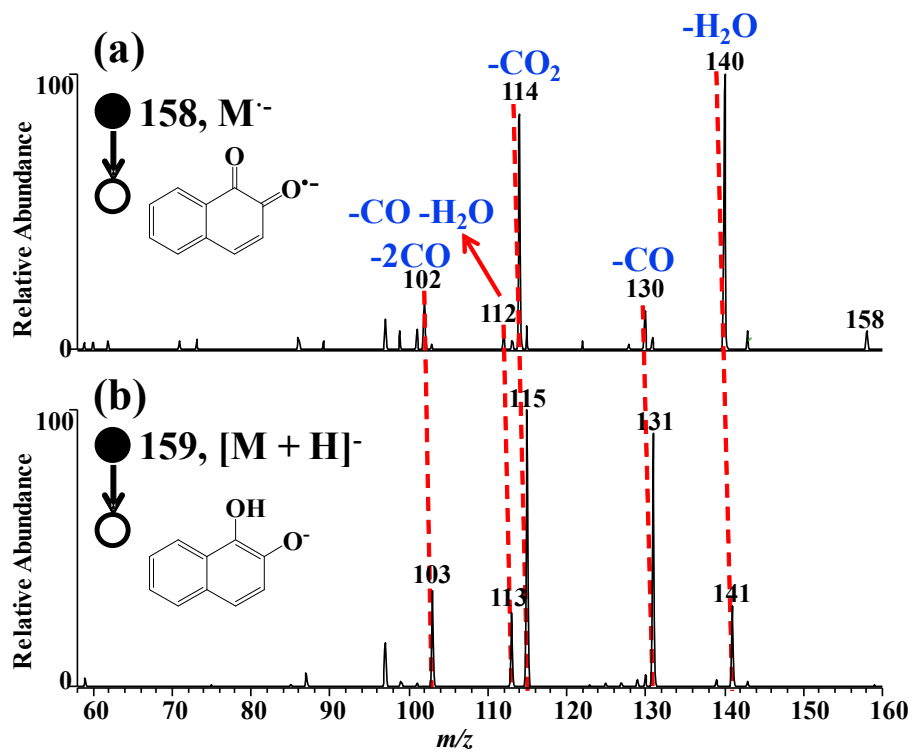

**Fig. S7** MS/MS spectra of a)  $M^{\bullet-}$  ( $m/z$  158) and b)  $[M + H]^{\bullet-}$  ( $m/z$  159) ions of 1,2-NQ

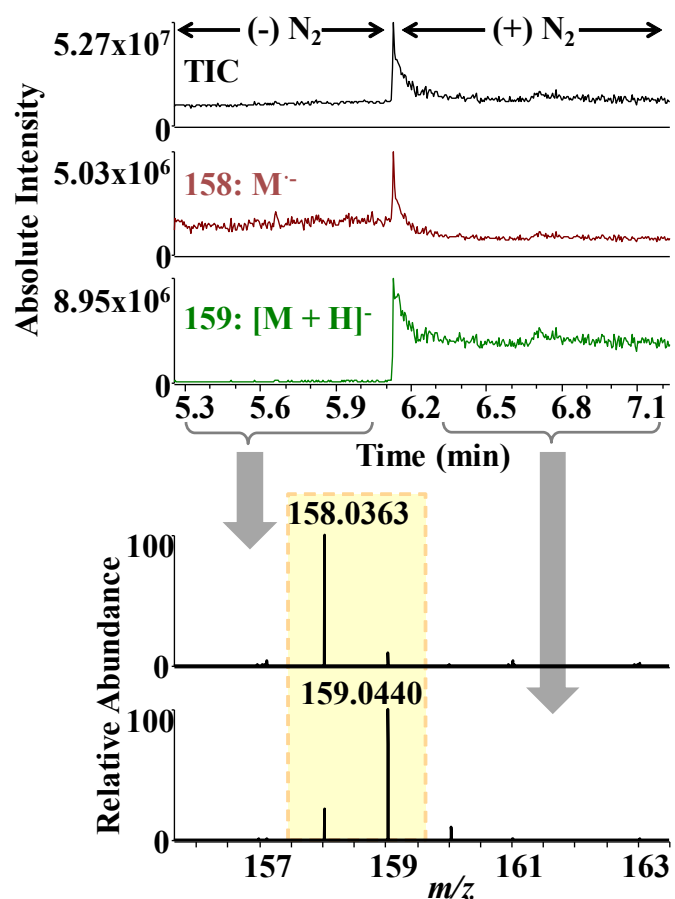

**Fig. S8** Effect of sheath gas ( $\text{N}_2$ ) on 1,2-NQ ( $5 \mu\text{g/mL}$ ) reduction in a commercial ESI source with Orbitrap Exactive Plus mass spectrometer. Flow rate =  $2 \mu\text{L}/\text{min}$ , spray voltage = 3 kV, solvent:  $\text{CH}_3\text{OH}/\text{H}_2\text{O}$  (v/v, 1:1),  $\text{C}_{\text{NH}_4\text{Ac}} = 5 \text{ mmol/L}$ .

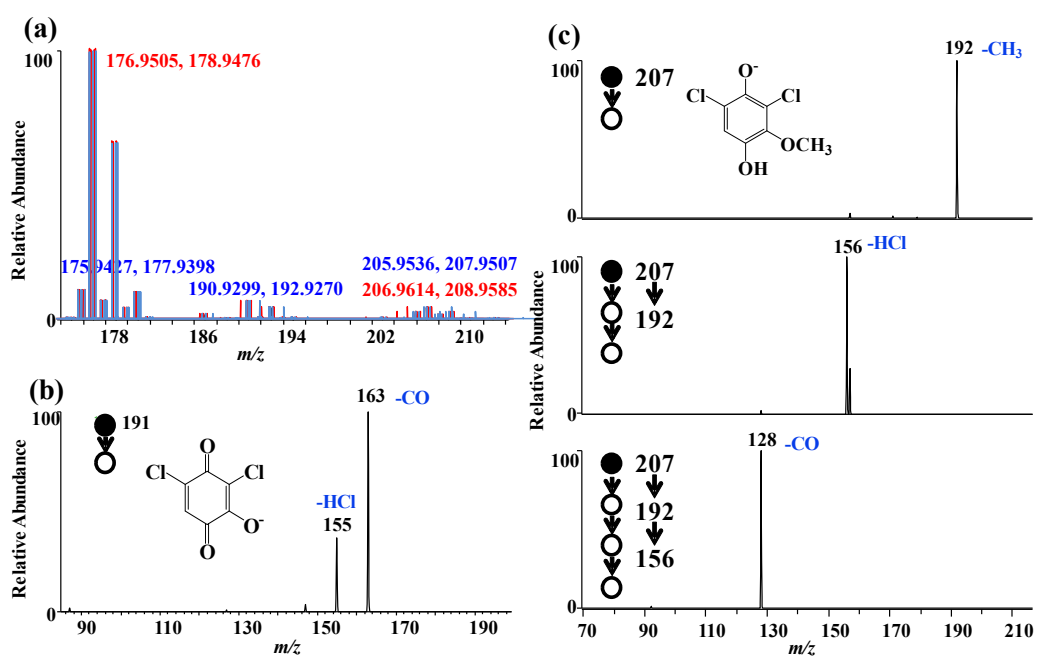

**Fig. S9** a) High resolution and (b, c)  $MS^n$  mass spectra of DCBQ and the derivatives.
